# Supplementary material for: Targeting Peptide, Fluorescent Reagent Modified Magnetic Liposomes Coated with Rapamycin Target Early Atherosclerotic Plaque and Therapy
Source: MDPI journal article supplement (doi:10.3390/pharmaceutics14051083), 2022-05-18
Supplement: s1 [file s1]

# Supplementary Material

## 1 Supplementary Figures

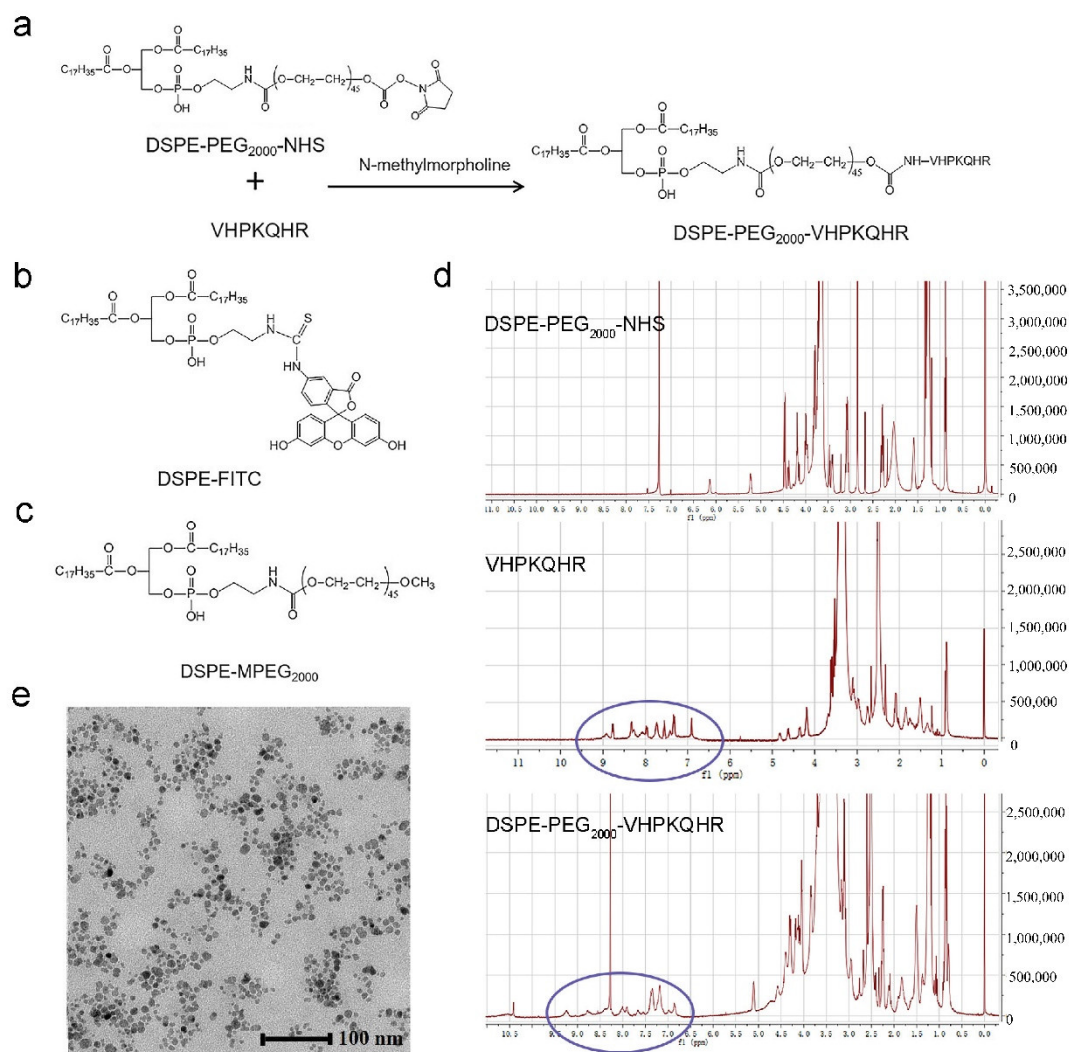

**Supplementary Figure S1.** Structure and characterization of materials used in the synthesis of Rap/Fe<sub>3</sub>O<sub>4</sub>@VHP-Lipo. (a) Synthetic chemical reaction formula of DSPE-PEG<sub>2000</sub>-VHPKQHR. (b) The chemical structure of DSPE-FITC. (c) The chemical structure of DSPE-MPEG<sub>2000</sub>. (d) <sup>1</sup>H NMR of reaction substrate DSPE-PEG<sub>2000</sub>-NHS, VHPKQHR peptide and reaction product DSPE-PEG<sub>2000</sub>-VHPKQHR. (e) The morphology of USPIO-BSA (Fe<sub>3</sub>O<sub>4</sub>) under TEM.

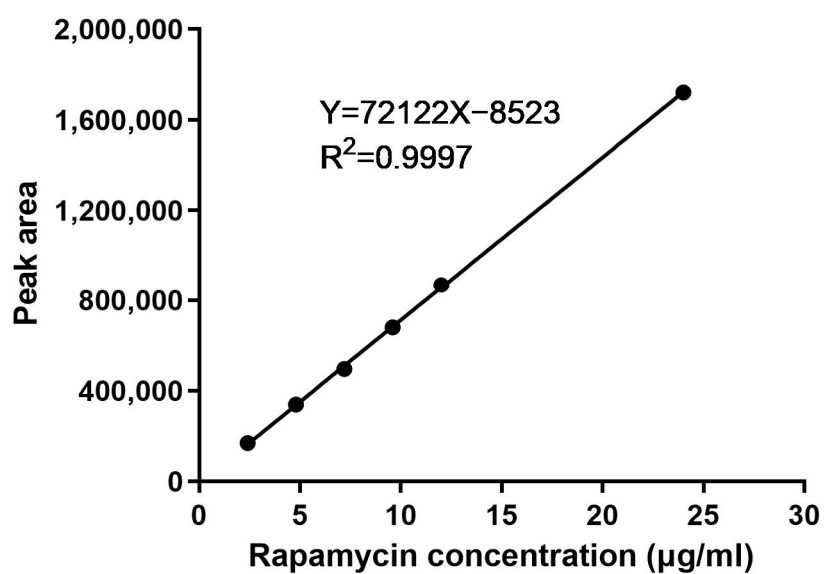

**Supplementary Figure S2.** Establishment of a method for the analysis of rapamycin by liquid chromatography. Linear relationship between rapamycin concentration and peak area measured by HPLC.

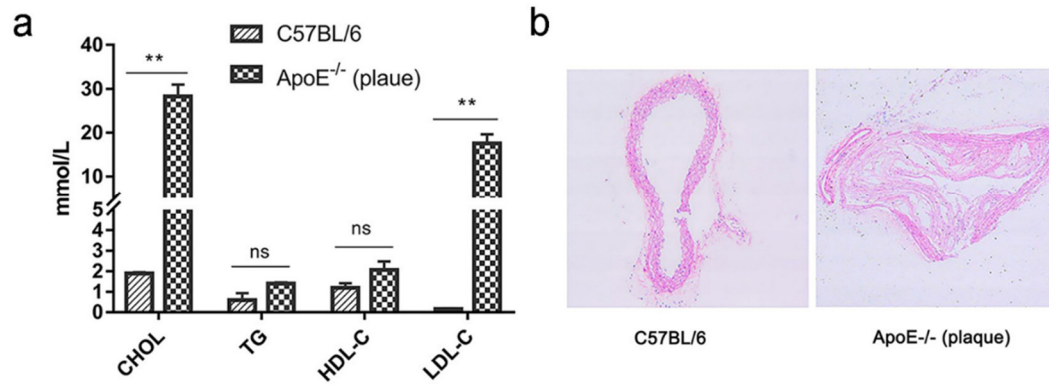

**Supplementary Figure S3.** Construction of atherosclerosis model mouse. (a) Comparison of blood lipid indexes of C57BL/6 mice fed with normal diet and ApoE<sup>-/-</sup> mice fed with high-fat diet (HFD) for 4 months. (b) H&E stained sections of isolated aorta of C57BL/6 mice and ApoE<sup>-/-</sup> mice with plaque. (\*\*  $p < 0.01$ , ns  $p > 0.05$ , mean =  $\pm$ SD).

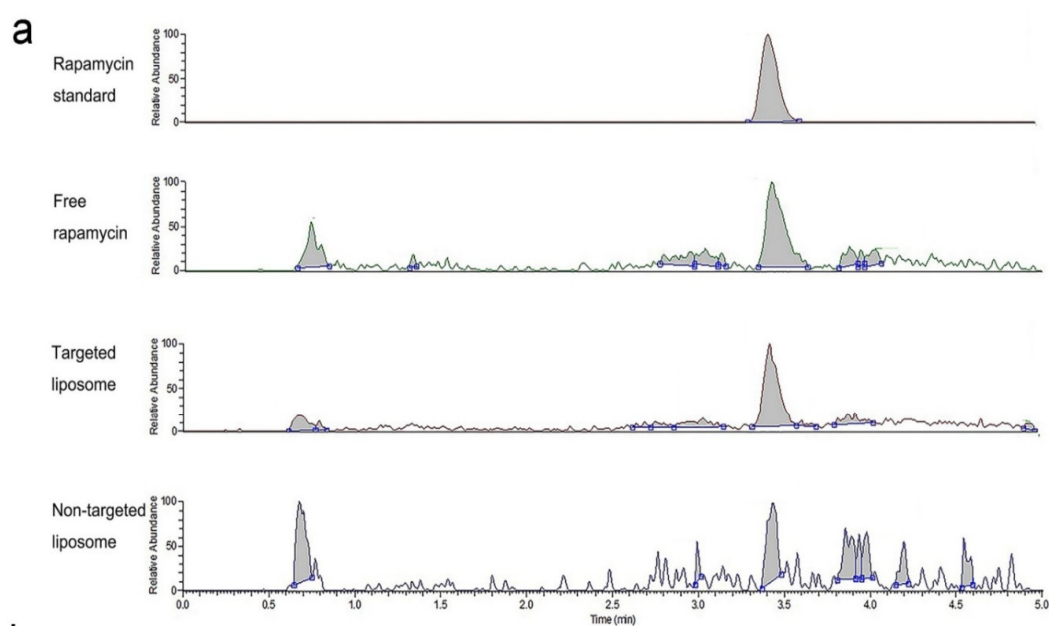

**b**

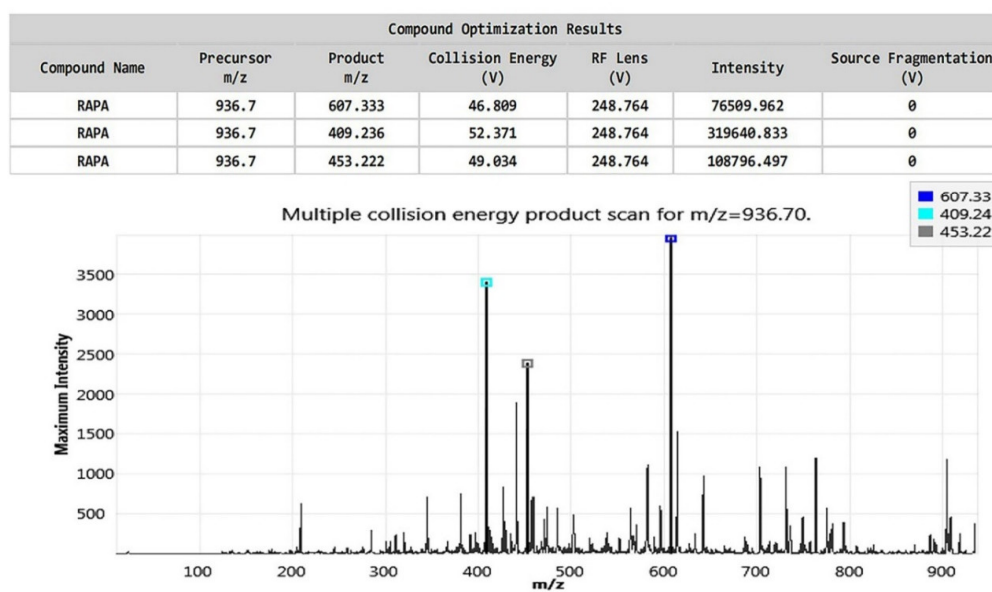

**Supplementary Figure S4.** Exploring the Chromatographic and Mass Spectrometric Conditions of Rapamycin. (a) The retention time of rapamycin in the liquid chromatography column of rapamycin standard, free rapamycin treated group blood samples, Rap/Fe<sub>3</sub>O<sub>4</sub>@Lipo treated group blood samples and Rap/Fe<sub>3</sub>O<sub>4</sub>@VHP-Lipo treated group blood samples. (b) The mass spectrum of rapamycin and the three most significant fragment ions.

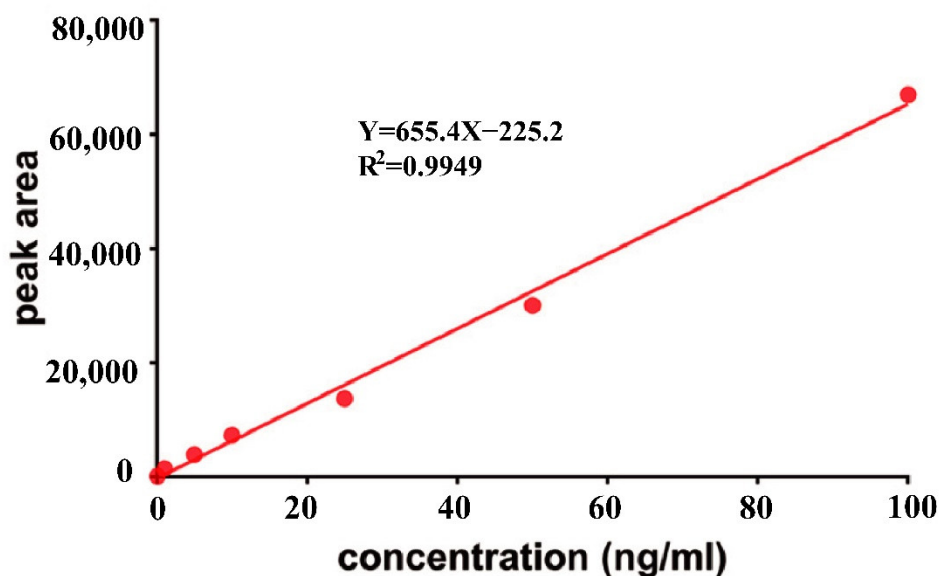

**Supplementary Figure S5.** Establishment of a liquid mass spectrometer method for the analysis of rapamycin concentration. Linearity between rapamycin concentration and peak area determined by LC-MS.

## 2 Supplementary table

**Supplementary Table S1.** Determination of the drug concentration in liposomes by HPLC. Take 200  $\mu$ L of liposome solution, dilute to 10 mL with methanol and measure drug concentration by HPLC.

| Area of peak | Determination of concentration | Drug loading | Encapsulated | The content of rapamycin |
|--------------|--------------------------------|--------------|--------------|--------------------------|
| 1327176.6    | 18.52 $\mu$ g/ml               | 5.5%         | 92.6%        | 0.926 mg/ml              |

Theoretical concentration =  $1000\mu\text{g/ml} \times 0.2/10 = 20\mu\text{g/ml}$ , Encapsulated =  $18.52/20 \times 100\% = 92.6\%$

The content of rapamycin =  $1\text{ mg/ml} \times 92.6\% = 0.926\text{ mg/ml}$

Drug loading =  $0.926 \times 2 / (0.926 \times 2 + 30 + 2) \times 100\% = 5.5\%$
